# Supplementary material for: Ru/g-C3N4 as an efficient catalyst for selective hydrogenation of aromatic diamines to alicyclic diamines
Source: Royal Society of Chemistry journal article supplement (doi:10.1039/d0ra00836b), 2020-01-01
Supplement: d0ra00836b1.pdf [file d0ra00836b1.pdf]

Supporting Information for

**Ru/g-C<sub>3</sub>N<sub>4</sub> as efficient catalyst for selective hydrogenation of  
aromatic diamines to alicyclic diamines**

**Junya Cao,<sup>a</sup> Fenggang Han,<sup>a b</sup> Ligu Wang, <sup>\*b c d e</sup> Xiaoyu Huang, <sup>a b</sup> Yan Cao,<sup>b</sup> Peng He, <sup>b</sup>  
Huanhuan Yang, <sup>b c d</sup> Jiaqiang Chen<sup>b</sup> and Huiquan Li<sup>\*b c d</sup>**

- a. *China University of Mining & Technology, Beijing, 100083, P. R. China*
- b. *CAS Key Laboratory of Green Process and Engineering, National Engineering Laboratory for Hydrometallurgical Clean Production Technology, Institute of Process Engineering, Chinese Academy of Sciences, Beijing, 100190, China.*
- c. *Sino-Danish College, University of Chinese Academy of Sciences, Beijing, 100049, China.*
- d. *Sino-Danish center for Education and Research, University of Chinese Academy of Sciences, Beijing, 10049, China.*
- e. *Dalian National Laboratory for Clean Energy, Dalian, 116023, China*

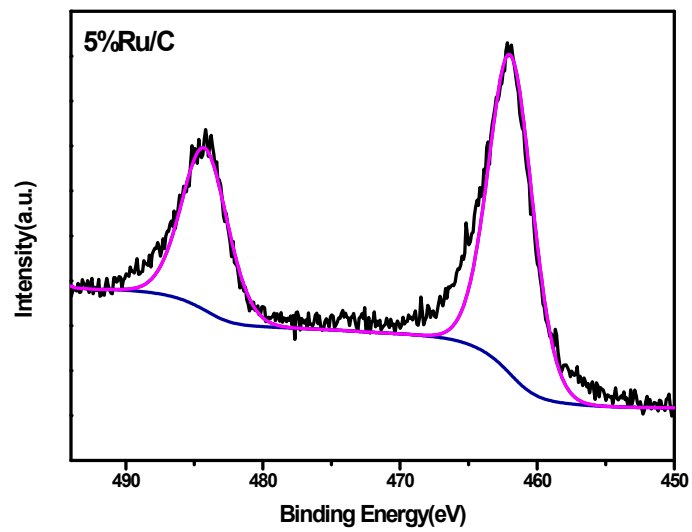

Figure S1. XPS spectra of Ru 3p for Ru/C

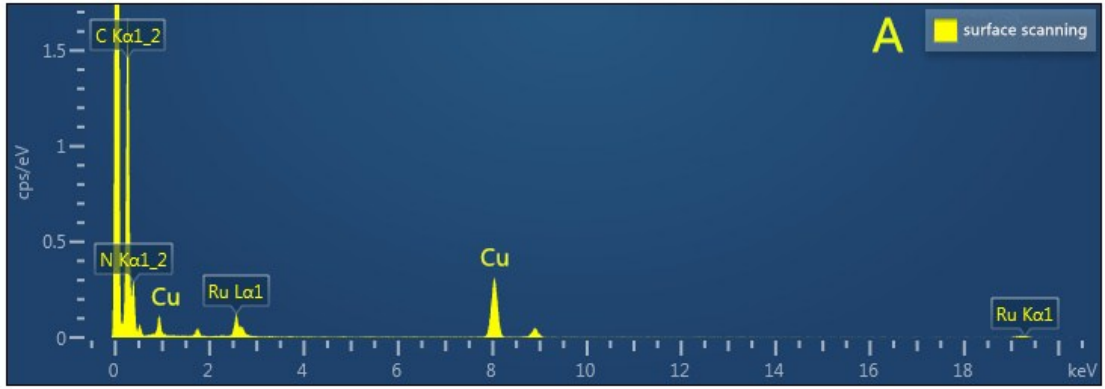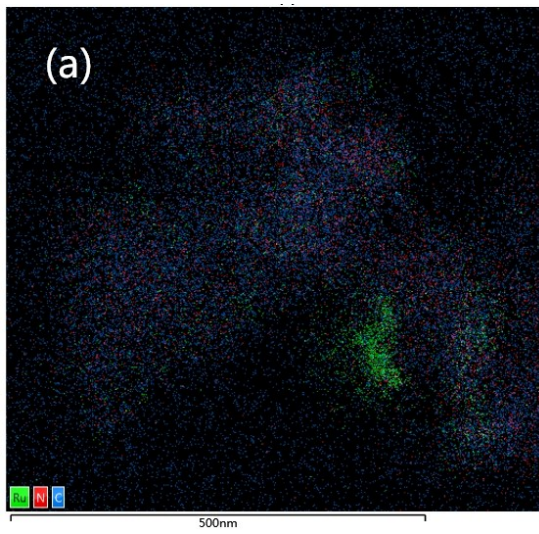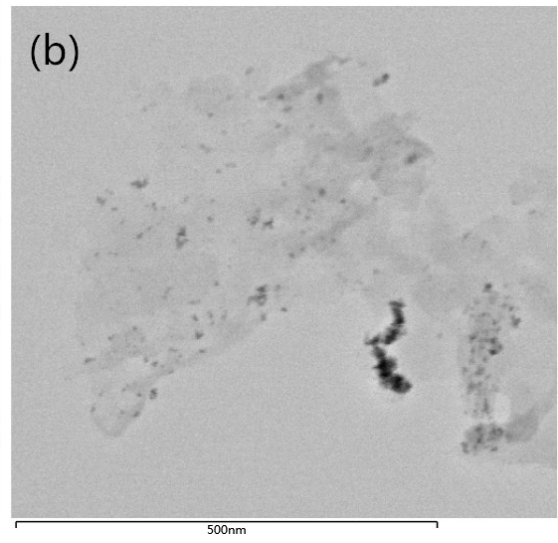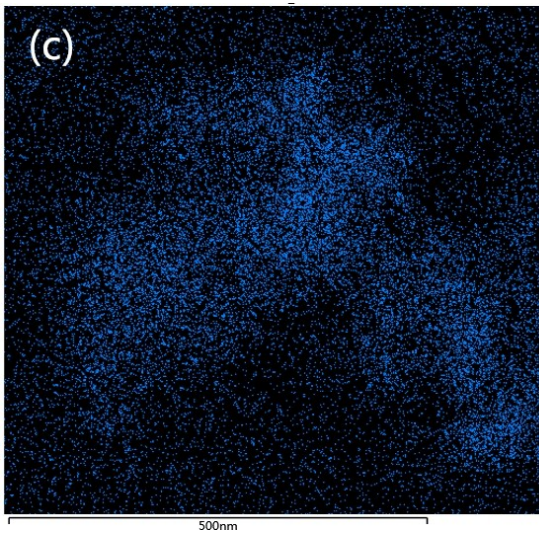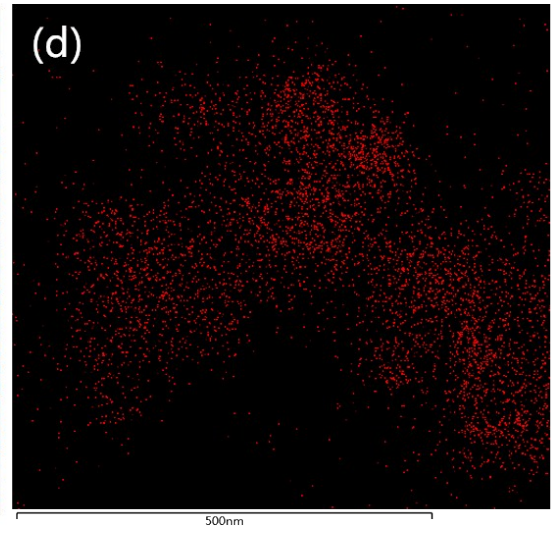

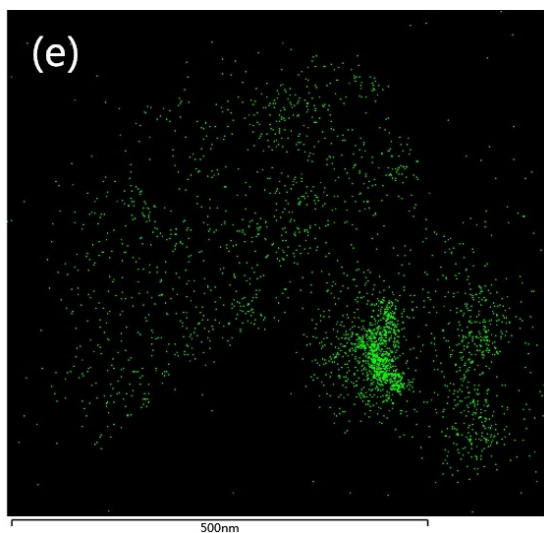

Figure S2. EDX spectra(A) ,TEM image (b) and EDX mapping of 5%Ru/g-C<sub>3</sub>N<sub>4</sub>-600 catalyst:(a) Overall state, (c) C-mapping, (d) N-mapping, (e) Ru-mapping

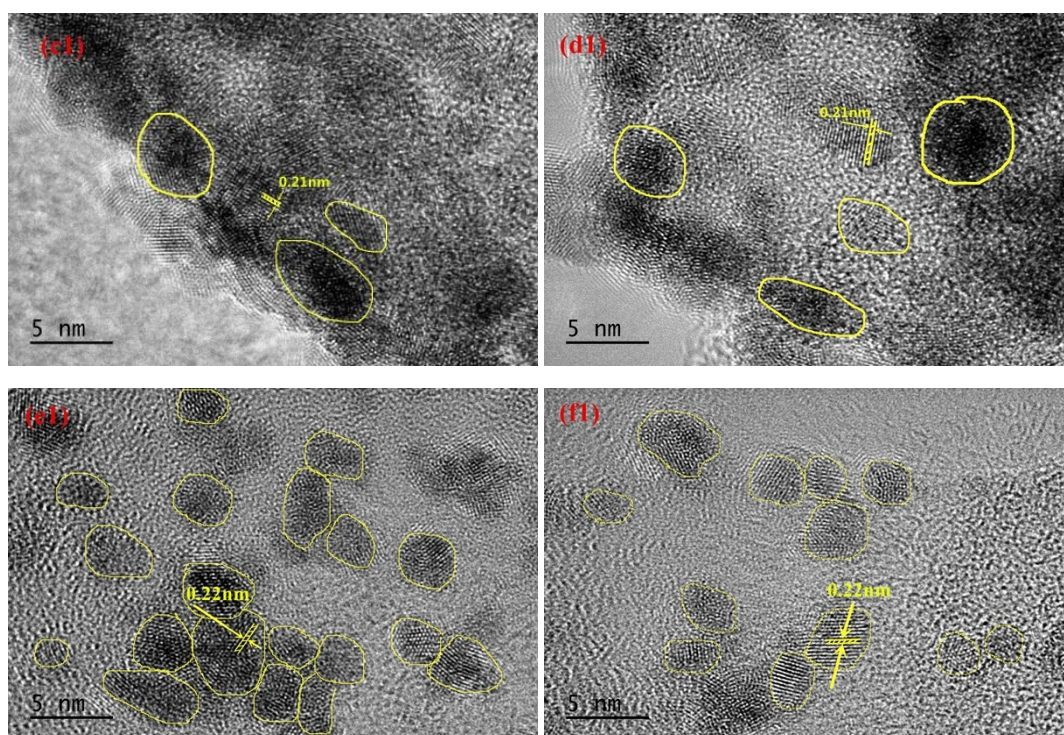

Figure S3. HR-TEM images of 5%Ru/g-C<sub>3</sub>N<sub>4</sub>-T catalysts , (c1) T = 450, (d1) T =500, (e1) T= 550, (f1) T = 600



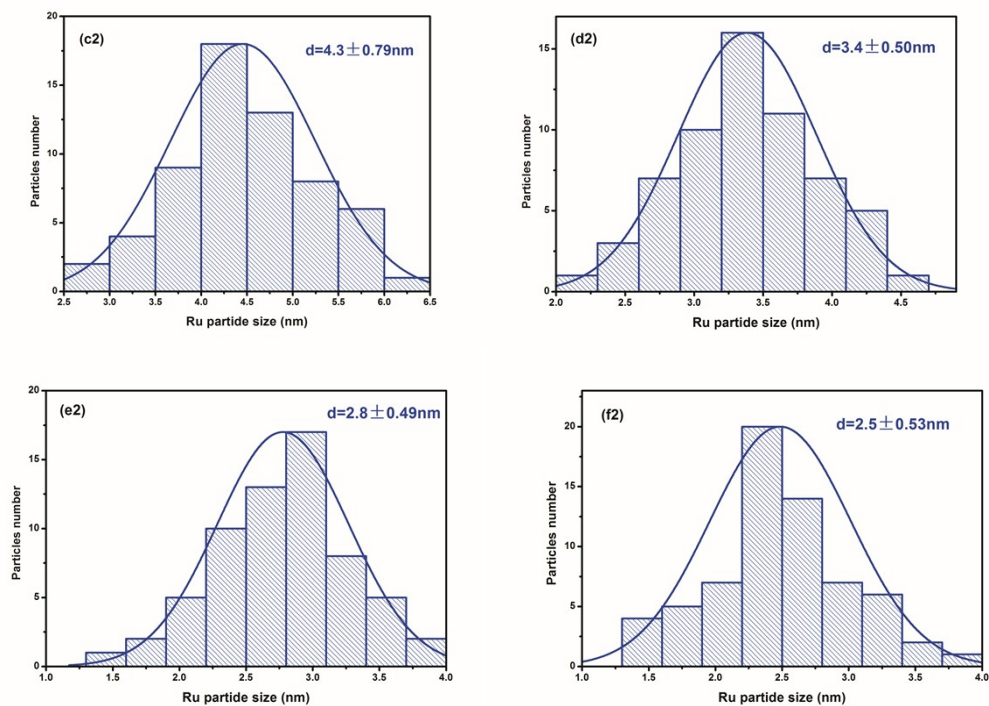

**Figure S4. Particle identification of 5%Ru/g-C<sub>3</sub>N<sub>4</sub>-T catalysts obtained by TEM, (c2) T = 450, (d2) T = 500, (e2) T = 550, (f2) T = 600**

<< 目标组分 >>

行号#:1 保留时间:3.125(扫描数#:26) 质量峰:288  
 原始模式:平均 3.120-3.130(25-27) 基峰:56.15(2806430)  
 背景模式:峰开始 3.020(5) 组 1 - 事件 1

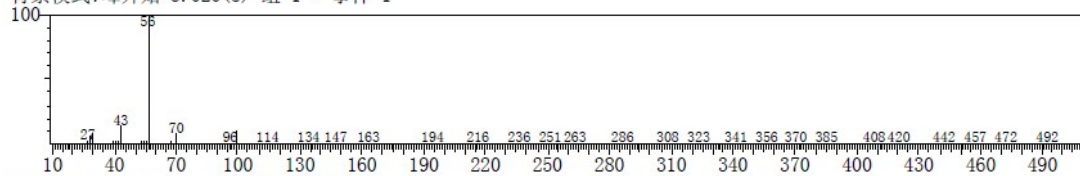

命中#:1 输入:1674 谱库:NIST08s.LIB  
 SI:97 分子式:C6H13N CAS:108-91-8 摩尔质量:99 保留指数:924  
 组分名称:Cyclohexanamine \$\$ Cyclohexylamine \$\$ Aminocyclohexane \$\$ Aminohexahydrobenzene \$\$ Benzenamine, he

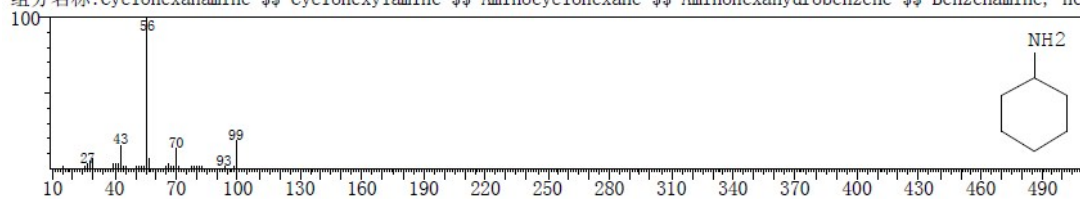

<< 目标组分 >>

行号#:2 保留时间:4.600(扫描数#:321) 质量峰:242  
原始模式:平均 4.595-4.605(320-322) 基峰:93.15(1030877)  
背景模式:峰开始 4.365(274) 组 1 - 事件 1

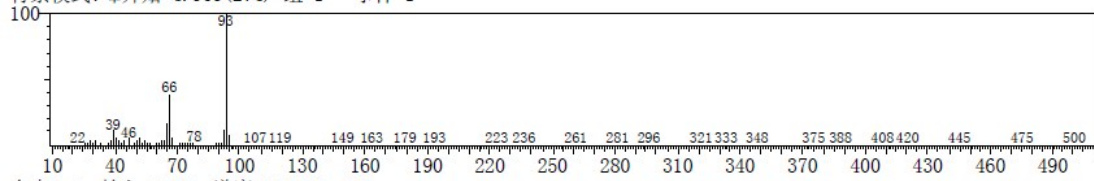

命中#:1 输入:1253 谱库:NIST08s.LIB  
SI:95 分子式:C6H7N CAS:62-53-3 摩尔质量:93 保留指数:992  
组分名称:Aniline \$\$ Benzenamine \$\$ Aminobenzene \$\$ Aminophen \$\$ Anyvim \$\$ Benzene, amino- \$\$ Blue Oil \$\$ C.:

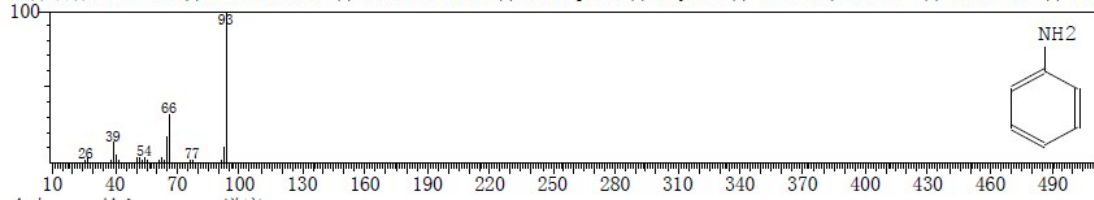

Figure S5. By-products in the liquid phase obtained by GC-MS
